# Supplementary material for: A theory of evolutionary dynamics on any complex population structure reveals stem cell niche architecture as a spatial suppressor of selection
Source: PubMed Central journal article supplement (PMC11143212; doi:10.1038/s41467-024-48617-2), 2024-05-31
Supplement: 41467_2024_48617_MOESM1_ESM.pdf [file 41467_2024_48617_MOESM1_ESM.pdf]

1 Supplementary Material: A theory of evolutionary dynamics on  
2 any complex population structure reveals stem cell niche  
3 architecture as a spatial suppressor of selection

4 Yang Ping Kuo<sup>1</sup>, César Nombela-Arrieta<sup>2</sup>, and Oana Carja <sup>\*1</sup>

5 <sup>1</sup>Computational Biology Department, School of Computer Science, Carnegie Mellon  
6 University, Pittsburgh, PA, USA

7 <sup>2</sup>Department of Medical Oncology and Hematology, University Hospital Zurich, Zurich,  
8 Switzerland

9 **Contents**

|    |                                                                   |           |
|----|-------------------------------------------------------------------|-----------|
| 10 | <b>1 The analytic approximation for the death-Birth process</b>   | <b>1</b>  |
| 11 | <b>2 The analytic approximation for the Birth-death process</b>   | <b>10</b> |
| 12 | <b>3 The change in amplification due to rewiring</b>              | <b>16</b> |
| 13 | <b>4 The approximation for detour graphs under weak selection</b> | <b>17</b> |
| 14 | <b>5 Supplementary figures</b>                                    | <b>22</b> |

15 **1 The analytic approximation for the death-Birth process**

16 Here we present a full description of the analytic approach under the death-Birth update rule.

---

\*To whom correspondence should be addressed. Email: oana.carja@gmail.com or ocarja@andrew.cmu.edu.

17 At every time step, let  $T_n^+$  and  $T_n^-$  denote the probabilities that node  $n$  changes its allelic type towards  
 18 or away from the mutant type. Let  $x_n$  denote the frequency of the mutant at this node  $n$  ( $x_n = 1$  means a  
 19 mutant occupies node  $n$  and  $x_n = 0$  means the node is occupied by the wild-type allele),  $\mathcal{N}(n)$  denote the  
 20 set of nodes connected to  $n$  and degree  $d_n$  denote the size of  $\mathcal{N}(n)$ . We can write

$$\begin{aligned}
 T_n^+ &= \frac{1 - x_n}{N} (1 + s) \frac{\sum_{m \in \mathcal{N}(n)} x_m}{d_n + s \sum_{m \in \mathcal{N}(n)} x_m} \\
 T_n^- &= \frac{x_n}{N} \frac{\sum_{m \in \mathcal{N}(n)} (1 - x_m)}{d_n + s \sum_{m \in \mathcal{N}(n)} x_m}.
 \end{aligned}
 \tag{1}$$

21 The  $(1 - x_n)/N$  term in  $T_n^+$  corresponds to the probability that node  $n$  is both a wild-type and is also  
 22 selected to die. The rest of the terms in  $T_n^+$  correspond to the probability that a neighboring mutant node  
 23 is selected to replace node  $n$  and can be written as the fraction of the mutant neighbor fitness over the total  
 24 fitness of neighbors of node  $n$ . This makes  $T_n^+$  and  $T_n^-$  difficult to work with. Using a power series expansion  
 25 we can write

$$\frac{1}{d_n + s \sum_{m \in \mathcal{N}(n)} x_m} = \frac{1}{d_n} - \frac{s}{d_n^2} \sum_{m \in \mathcal{N}(n)} x_m + s^2 \mathcal{O}(x^2).
 \tag{2}$$

26 This will later make the calculations easier.

27 The approach we take here is to use the node degree distribution, and only keep track of the mutant  
 28 frequencies  $x_i$  at all  $N_i$  nodes of the same degree  $d_i$ . Let  $D = \{d_1, d_2, \dots, d_i, \dots\}$  represent the set of all  
 29 possible node degrees. We denote the frequency of nodes of degree  $d_i$  in the population by  $p_i$ . To model  
 30 node degree mixing, we use  $p_{ij}$  to denote the probability that a node of degree  $d_i$  is connected to a node of  
 31 degree  $d_j$ . The probability that the mutant frequency increases by  $1/N_i$  in nodes of degree  $d_i$ ,  $T_i^+$ , is given

32 by

$$\begin{aligned}
T_i^+ &= (1+s) \sum_{n \in G} \left[ \delta(d_i, d_n) \frac{1-x_i}{N} \left( \sum_{m \in \mathcal{N}(n)} x_m \right) \left( \frac{1}{d_i} - \frac{s}{d_i^2} \sum_{m \in \mathcal{N}(n)} x_m + s^2 \mathcal{O}(x^2) \right) \right] \\
&= (1+s) \frac{1-x_i}{N} \sum_{n \in G} \left[ \delta(d_i, d_n) \left( \sum_{j \in D} e_{nj} x_j \right) \left( \frac{1}{d_i} - \frac{s}{d_i^2} \sum_{j \in D} e_{nj} x_j + s^2 \mathcal{O}(x^2) \right) \right] \\
&= (1+s) \left[ \frac{1-x_i}{N} \frac{1}{d_i} \sum_{n \in G} \delta(d_i, d_n) \sum_{j \in D} e_{nj} x_j + \frac{1}{N} \frac{s}{d_i^2} \sum_{n \in G} \delta(d_i, d_n) \left( \sum_{j \in D} e_{nj} x_j \right)^2 \right] + s^2 \mathcal{O}(x^3) \\
&= (1+s) \frac{1-x_i}{N} \frac{1}{d_i} \sum_{j \in D} e_{ij} x_j + s \mathcal{O}(x^2) + s^2 \mathcal{O}(x^3) \\
&= (1+s) \frac{1-x_i}{N} \frac{1}{d_i} \sum_{j \in D} N p_i p_{ij} d_i x_j + s \mathcal{O}(x^2) + s^2 \mathcal{O}(x^3) \\
&= (1+s)(1-x_i) \sum_{j \in D} p_i p_{ij} x_j + s \mathcal{O}(x^2) + s^2 \mathcal{O}(x^3), \tag{3}
\end{aligned}$$

33 while the probability that the mutant frequency decreases by  $1/N_i$ ,  $T_i^-$ , is given by

$$T_i^- = x_i \sum_{j \in D} p_i p_{ij} (1-x_j) + s \mathcal{O}(x^2) + s^2 \mathcal{O}(x^3). \tag{4}$$

34 Here,  $\delta(d_i, d_n)$  is the Kronecker delta function, the set  $G$  represents all the nodes in the graph,  $e_{nj}$  denotes  
35 the number of edges that connect node  $n$  to nodes of degree  $d_j$  and  $e_{ij}$  denotes the number of edges that  
36 connect nodes of degree  $d_i$  to nodes of degree  $d_j$ .

37 The probability of fixation of allele  $a$  can then be approximated using the diffusion approximation. We  
38 will first need to calculate the first and second moment of the change in frequency of the mutant allele at all  
39 nodes of degree  $d_i$ , at every time step:

$$E[\Delta x_i] = (T_i^+ - T_i^-) \Delta x_i = \frac{1}{N p_i} (T_i^+ - T_i^-) = \mathcal{O}(x), \tag{5}$$

$$E[(\Delta x_i)^2] = (T_i^+ + T_i^-) (\Delta x_i)^2 = \frac{1}{N^2 p_i^2} (T_i^+ + T_i^-) = \mathcal{O}(x), \tag{6}$$

$$E[\Delta x_i \Delta x_j] = 0, \tag{7}$$

$$E[\Delta x_i] E[\Delta x_j] = (T_i^+ - T_i^-) (T_j^+ - T_j^-) (\Delta x_i)^2 = \frac{1}{N^2 p_i p_j} (T_i^+ - T_i^-) (T_j^+ - T_j^-) = \mathcal{O}(x^2). \tag{8}$$

40 This allows us to write the mean change in mutant frequency at every time step as

$$\mu_i = \frac{E[\Delta x_i]}{\Delta t} = \frac{1}{p_i}(T_i^+ - T_i^-). \quad (9)$$

41 It is worth noting that in many diffusion models the variance can be approximated as the second moment  
 42 and the covariance is omitted since the product of the first moments is often on the order of  $s^2$ . This is not  
 43 the case in our model, since here the first moment is on the order of  $s^0$  therefore the product of the first  
 44 moments does not go away by assuming sufficiently small  $s$ .

45 The variance in mutant frequency change can be written as

$$\sigma_{ii} = \frac{E[(\Delta x_i)^2] - (E[\Delta x_i])^2}{\Delta t} = \frac{1}{Np_i^2}[T_i^+ - T_i^- - (T_i^+ - T_i^-)^2], \quad (10)$$

46 while the covariance can be written as

$$\sigma_{ij} = \frac{-E[\Delta x_i]E[\Delta x_j]}{\Delta t} = -\frac{1}{Np_i p_j}(T_i^+ - T_i^-)(T_j^+ - T_j^-). \quad (11)$$

47 We write the Kolmogorov backward equation

$$\begin{aligned} \frac{\partial P}{\partial t} &= \frac{1}{2} \sum_{i,j \in D} \sigma_{ij} \frac{\partial^2 P}{\partial x_i \partial x_j} + \sum_{i \in D} \mu_i \frac{\partial P}{\partial x_i} \\ &= -\frac{1}{2N} \sum_{i \neq j} \mathcal{O}(x^2) \frac{\partial^2 P}{\partial x_i \partial x_j} + \sum_{i \in D} \mathcal{O}(x) \left( \frac{1}{2N} \frac{\partial^2 P}{\partial x_i^2} + \frac{\partial P}{\partial x_i} \right), \end{aligned} \quad (12)$$

48 and solve for zero

$$-\frac{1}{2N} \sum_{i \neq j} \mathcal{O}(x^2) \frac{\partial^2 P}{\partial x_i \partial x_j} + \sum_{i \in D} \mathcal{O}(x) \left( \frac{1}{2N} \frac{\partial^2 P}{\partial x_i^2} + \frac{\partial P}{\partial x_i} \right) = 0. \quad (13)$$

49 Given the initial mutant frequencies  $\vec{x}$ ,  $P(\vec{x})$  gives an approximation for the fixation probability of the mutant  
 50 allele  $a$ . It is difficult to find a closed form solution for  $P(\vec{x})$ , since coefficients in the PDE in equation (13) are  
 51 polynomials of  $x$ . Due to the similarity between the Kolmogorov backward equation here and the Kolmogorov  
 52 backward equation for the finite island model (Tachida and Iizuka, 1991), we can use singular perturbation  
 53 methods to approximate the solution (Gavrilets and Gibson, 2002). This method tries to find the solution  
 54 to the PDE of interest near singular points, where the function changes value rapidly. This usually occurs  
 55 in the region of space where the PDE coefficients vanish and therefore where the first derivatives are large  
 56 in magnitude.

57 For our PDE, the singular points occur at  $\vec{x} = \vec{0}$  and  $\vec{x} = \vec{1}$ . For  $s > 0$ , we solve the PDE at  $\vec{x} = \vec{0}$ , while  
 58 for  $s \leq 0$ , we solve for  $\vec{x} = \vec{1}$ . Intuitively, the fixation probability for any mutant with selective advantage  $s$   
 59 should be unity in the deterministic infinite population case.

60 In finite populations however, fixation is controlled by both the force of selection and the force of drift.  
 61 The force of drift is proportional to  $1/N$  and can cause even beneficial mutants to become extinct. As mutant  
 62 frequency increases in the population, past establishment, the force of selection starts to dominate the force  
 63 of drift and the fixation probability starts approaching one rapidly. For deleterious mutations, the fixation  
 64 probability should be small unless the number of mutants is close to population size  $N$ ; therefore, for  $s \leq 0$ ,  
 65  $P$  decreases to 0 when  $\vec{x}$  moves away from  $\vec{1}$ .

66 For  $s > 0$ , we introduce new variables  $y_i$ , such that  $\epsilon y_i = x_i$ , where  $\epsilon = \frac{1}{N}$ . We can write

$$\frac{\partial P}{\partial x_i} = \frac{\partial P}{\partial y_i} \frac{dy_i}{dx_i} = \frac{1}{\epsilon} \frac{\partial P}{\partial y_i} \quad (14)$$

67 and

$$\frac{\partial^2 P}{\partial x_i \partial x_j} = \frac{\partial}{\partial x_i} \left( \frac{\partial P}{\partial y_j} \frac{dy_j}{dx_j} \right) = \frac{\partial^2 P}{\partial y_i \partial y_j} \frac{dy_i}{dx_i} \frac{dy_j}{dx_j} + \frac{\partial P}{\partial y_j} \frac{\partial^2 y_i}{\partial x_i \partial x_j} = \frac{1}{\epsilon^2} \frac{\partial^2 P}{\partial y_i \partial y_j}. \quad (15)$$

68 We can substitute (14) and (15) into (13) and write

$$-\frac{1}{2} \sum_{i \neq j} \epsilon^{-1} \mathcal{O}(\epsilon^2 y^2) \frac{\partial^2 P}{\partial y_i \partial y_j} + \sum_{i \in D} \mathcal{O}(\epsilon y) \left( \frac{1}{2} \epsilon^{-1} \frac{\partial^2 P}{\partial y_i^2} + \epsilon^{-1} \frac{\partial P}{\partial y_i} \right) = 0. \quad (16)$$

69 For large population sizes,  $\epsilon = 1/N$  becomes vanishingly small, therefore in the equation above, we can  
 70 ignore higher order terms of  $\epsilon$ . Therefore we can approximate (16) by

$$\sum_{i \in D} \mathcal{O}(y) \left( \frac{1}{2} \frac{\partial^2 P}{\partial y_i^2} + \frac{\partial P}{\partial y_i} \right) = 0. \quad (17)$$

71 We expand equation (17) and write

$$\sum_{i, j \in D} p_i p_{ij} \left( \frac{1}{2 p_i^2} ((1+s)y_j + y_i) \frac{\partial^2}{\partial y_i^2} + \frac{1}{p_i} ((1+s)y_j - y_i) \frac{\partial}{\partial y_i} \right) P = 0 \quad (18)$$

72 It is important to note that the Kolmogorov backward equations for the death-Birth model we consider  
 73 here and the Death-birth voter model (the update process where a node is first picked for death with  
 74 probability inversely proportional to fitness, and a random neighbor is then selected to replace it) are identical  
 75 after singular perturbation. The Kolmogorov backward equations for the Birth-death model considered here

76 and the birth-Death model also share the same equations. This implies that the dB and Db should have  
 77 identical fixation probabilities for the same network. Indeed, the two processes lead to similar evolutionary  
 78 dynamics (Chen et al., 2013).

79 The solution to the differential equation in (18) has the form

$$P = c_0 + c_1 \exp \left\{ - \sum_j p_j A_j y_j \right\}. \quad (19)$$

80 We can substitute this solution back into the Kolmogorov backward equation (18) and solve for the unknown  
 81 exponents:

$$\begin{aligned} & \sum_{i,j \in D} \left( \frac{1}{2} (1+s) A_i^2 p_i p_{ij} y_j + \frac{1}{2} A_i^2 p_i p_{ij} y_i - (1+s) A_i p_i p_{ij} y_j + A_i p_i p_{ij} y_i \right) \\ &= \sum_{i,j \in D} \left( \frac{1}{2} (1+s) A_j^2 p_j p_{ji} y_i + \frac{1}{2} A_j^2 p_j p_{ji} y_j - (1+s) A_j p_j p_{ji} y_i + A_j p_j p_{ji} y_j \right) = 0. \end{aligned} \quad (20)$$

82 We end up with the following system of quadratic equations to solve:

$$\sum_{j \in D} \left( (1+s) A_j^2 p_j p_{ji} + A_i^2 p_i p_{ij} - 2(1+s) A_j p_j p_{ji} + 2A_i p_i p_{ij} \right) = 0 \quad \forall i. \quad (21)$$

83 This is a system of  $|D|$  (the number of unique degrees in the graph) elliptic equations in  $|D|$ -dimensional  
 84 space and the solution to this system corresponds to the set of points in space where all these surfaces  
 85 intersect. There is a trivial intersection point at the origin. This solution, however, causes  $P$  to be undefined  
 86 so it is not the solution we are interested in. Assuming there is a non-trivial real solution to this system, we  
 87 can use geometric intuition to estimate where the solution is. We do this by summing all the equations in  
 88 the system to get the following equation

$$\begin{aligned} & \sum_{i,j \in D} \left( (1+s) A_j^2 p_j p_{ji} + A_i^2 p_i p_{ij} - 2(1+s) A_j p_j p_{ji} + 2A_i p_i p_{ij} \right) \\ &= \sum_{i,j \in D} \left( (1+s) A_i^2 p_i p_{ij} + A_j^2 p_j p_{ji} - 2(1+s) A_i p_i p_{ij} + 2A_j p_j p_{ji} \right) \\ &= \sum_{i \in D} \left( (1+s) A_i^2 p_i + A_i^2 p_i - 2(1+s) A_i p_i + 2A_i p_i \right) \\ &= \sum_{i \in D} \left[ (2+s) A_i^2 p_i - 2s A_i p_i \right] = 0. \end{aligned} \quad (22)$$

89 In elliptic form,

$$\sum_{i \in D} p_i \left( A_i - \frac{s}{2+s} \right)^2 = \left( \frac{s}{2+s} \right)^2. \quad (23)$$

90 This equation provides valuable information on the dynamics of the system. This ellipsoid contains all  
 91 solutions to the system since it is constructed from a linear combination of these ellipsoids. It is centered at  
 92  $s/(2+s)\vec{1}$ , with axial lengths proportional to  $s/(2+s)$ . In the neutral case where  $s = 0$ , this ellipsoid collapses  
 93 into a point at the origin. Since all solutions of the elliptic system coincide with this point, the system has  
 94 exactly one real solution at the origin. When  $s$  increases from 0, the distance between the solution at the  
 95 origin and all other real solutions grows proportional to the axial lengths, which themselves are proportional  
 96 to  $s/(2+s)$ . We will use these intuitions later to derive simpler forms of the solutions of the entire system.

97 Next, we use regular perturbation to study the system. We can write the solutions of the system as

$$A_i = A_{i,0} + sA_{i,1} + \mathcal{O}(s^2) \quad (24)$$

98 Substitute this and the following

$$A_i^2 = A_{i,0}^2 + sA_{i,0}A_{i,1} + \mathcal{O}(s^2) \quad (25)$$

99 into the elliptic system and we have

$$\begin{aligned} \sum_{j \in D} \left[ (1+s)(A_{j,0}^2 + sA_{j,0}A_{j,1} - 2A_{j,0} - 2sA_{j,1})p_j p_{ji} \right. \\ \left. + (A_{i,0}^2 + sA_{i,0}A_{i,1} + 2A_{i,0} + 2sA_{i,1})p_i p_{ij} \right] = \mathcal{O}(s^2). \end{aligned} \quad (26)$$

100 In the order of  $s^0$ , we can derive  $A_{i,0}$  using

$$\sum_{j \in D} \left[ (A_{j,0}^2 - 2A_{j,0})p_j p_{ji} + (A_{i,0}^2 + 2A_{i,0})p_i p_{ij} \right] = 0. \quad (27)$$

101 This is exactly the elliptic system corresponding to the neutral case where  $s = 0$ . We know from the argument  
 102 above that this system only has one real solution at the origin.

103 For the order of  $s^1$ , we can derive  $A_{i,1}$  using

$$\sum_{j \in D} \left( -2A_{j,1}p_j p_{ji} + 2A_{i,1}p_i p_{ij} \right) = 0. \quad (28)$$

104 Using the fact that the number of edges going from nodes of degree  $d_i$  to nodes of degree  $d_j$  is equal to  
 105 the number of edges going from nodes of degree  $d_j$  to nodes of degree  $d_i$  (the handshaking lemma), we can  
 106 write

$$p_i p_{ij} d_i = p_j p_{ji} d_j. \quad (29)$$

107 We rewrite the above as

$$\sum_{j \in D} p_j p_{ji} \left( -A_{j,1} + A_{i,1} \frac{d_j}{d_i} \right) = 0. \quad (30)$$

108 It follows that points on the line  $A_{i,1} = Ad_i$  satisfy this equation. Substituting in (24), we now have an  
 109 approximation of the solution of the elliptic system

$$A_i = sAd_i + \mathcal{O}(s^2). \quad (31)$$

110 This agrees with the fact that the real solutions of the elliptic system grow proportional to  $s/(2+s)$  (from  
 111 (23)).

112 We still have to find  $A$ . Since we know the solution to the system must also satisfy equation (23), the  
 113 value of  $A$  that approximates the solution of the system is

$$\begin{aligned} & \sum_{i \in D} \left[ (2+s)p_i A^2 d_i^2 - 2s p_i A d_i \right] = 0 \\ \implies & (2+s)A^2 \sum_{i \in D} p_i d_i^2 - 2sA \sum_{i \in D} p_i d_i = 0 \\ \implies & (2+s)A^2 \langle d^2 \rangle - 2sA \langle d \rangle = 0 \\ \implies & (2+s)A \langle d^2 \rangle = 2s \langle d \rangle \\ \implies & A = \frac{2s}{2+s} \frac{\langle d \rangle}{\langle d^2 \rangle}. \end{aligned} \quad (32)$$

114 Here  $\langle d^k \rangle$  represents the  $k$ -th moment of the degree distribution. We substitute this back into (19) and can  
 115 thus find the constants that satisfy the boundary conditions that  $P(\vec{x} = \vec{0}) = 0$  and  $P(\vec{x} = \vec{1}) = 1$ .



116 We can therefore write the approximation for the fixation probability as

$$\begin{aligned}
 P(\vec{x}) &= \left[ 1 - \exp \left\{ -N \frac{2s}{2+s} \frac{\langle d \rangle}{\langle d^2 \rangle} \sum_{i \in D} p_i d_i x_i \right\} \right] \left[ 1 - \exp \left\{ -N \frac{2s}{2+s} \frac{\langle d \rangle}{\langle d^2 \rangle} \sum_{i \in D} p_i d_i \right\} \right]^{-1} \\
 &= \left[ 1 - \exp \left\{ -N \frac{2s}{2+s} \frac{\langle d \rangle}{\langle d^2 \rangle} \sum_{i \in D} p_i d_i x_i \right\} \right] \left[ 1 - \exp \left\{ -N \frac{2s}{2+s} \frac{\langle d \rangle^2}{\langle d^2 \rangle} \right\} \right]^{-1}. \tag{33}
 \end{aligned}$$

117 Assuming the probability that the mutant was introduced uniformly into the network, the fixation probability  
 118 is

$$P\left(\vec{x} = \frac{\vec{1}}{N}\right) = \left[ 1 - \exp \left\{ -\frac{2s}{2+s} \frac{\langle d \rangle^2}{\langle d^2 \rangle} \right\} \right] \left[ 1 - \exp \left\{ -N \frac{2s}{2+s} \frac{\langle d \rangle^2}{\langle d^2 \rangle} \right\} \right]^{-1}. \tag{34}$$

119 To summarize, the fixation probability for the death-Birth process on a network is given by

$$P_{dB} = \frac{1 - e^{-\alpha_{dB} s / (1+s/2)}}{1 - e^{-\alpha_{dB} N s / (1+s/2)}} \quad \text{where } \alpha_{dB} = \frac{\langle d \rangle^2}{\langle d^2 \rangle} \tag{35}$$

120 For the special case of uncorrelated networks, our approximation coincides with the fixation probability of  
 121 the Death-birth voter model (Antal et al., 2006). As mentioned before, this is expected, as the Kolmogorov  
 122 backward equations after singular perturbation are identical for the Death-birth and the death-Birth update  
 123 rules. Our result however apply across network families, not just for the special case of uncorrelated networks.

124 In **Supplementary Figure S4** we show how well (35) approximates the fixation probability obtained  
 125 from solving (21) numerically. In our derivation of the approximation, we ignored the  $\mathcal{O}(s^2)$  portion of the  
 126 roots of (21). The error that accumulates is on the order of  $Ns^2$ , therefore as long as  $s \ll N^{-1/2}$  the  
 127 approximation should hold. The approximate solution to the KBE remains accurate with few exceptions.  
 128 In evolving populations, we are often interested in cases where there exists an interplay between drift and  
 129 selection. This requires both forces to have similar magnitudes. This implies  $s \approx \frac{1}{N}$ , which implies  $Ns^2 \approx$   
 130  $\frac{1}{N} \ll 1$  in large populations.

## 2 The analytic approximation for the Birth-death process

We now discuss the probability of fixation of a new mutant under the Birth-death process. Following similar steps as the previous section, we start by writing down the probabilities  $T_n^+$  and  $T_n^-$  that a node  $n$  switches allelic type towards or away from the mutant state. We can write

$$\begin{aligned} T_n^+ &= (1+s) \frac{\sum_{m \in \mathcal{N}(n)} x_m d_m^{-1} (1-x_n)}{N+s \sum_{m \in \mathcal{N}(n)} x_m} \\ T_n^- &= \frac{\sum_{m \in \mathcal{N}(n)} (1-x_m) d_m^{-1} x_n}{N+s \sum_{m \in \mathcal{N}(n)} x_m}. \end{aligned} \tag{36}$$

The denominator in  $T_n^+$  is the total fitness of the population. Since it is shared across all  $T$ s we will represent it as  $Nw$ , where  $w$  is the mean fitness of the population. The  $x_m$  term in  $T_n^+$  divided by the denominator corresponds to the probability that the focal node  $n$  has a mutant neighbor node selected to reproduce for the Birth step. The rest of the terms in  $T_n^+$  constitute the probability that node  $n$  is the node selected at the death step. This probability of death is one over the degree of node  $m$ , an arbitrary neighbor of  $n$ . It might seem that this is as complicated as the transition probabilities for the dB update rule, and we should simplify using the power series. However, we do not need to do that here since the denominator can be multiplied out.

Similarly to the case of the death-Birth process, we use the degree mean field approximation. The probability that the mutant frequency increases by  $1/N_i$  for nodes of degree  $d_i$ ,  $T_i^+$ , is given by

$$\begin{aligned} T_i^+ &= \frac{(1+s)}{Nw} \sum_{n \in G} \left[ \delta(d_i, d_n) \left( \sum_{m \in \mathcal{N}(n)} x_m d_m^{-1} (1-x_i) \right) \right] \\ &= \frac{(1+s)}{Nw} \sum_{n \in G} \left[ \delta(d_i, d_n) \left( \sum_{j \in D} e_{jn} x_j d_j^{-1} (1-x_i) \right) \right] \\ &= \frac{(1+s)}{Nw} \sum_{j \in D} e_{ji} x_j d_j^{-1} (1-x_i) \\ &= \frac{(1+s)}{Nw} \sum_{j \in D} N p_j p_{ji} d_j x_j d_j^{-1} (1-x_i) \\ &= \frac{(1+s)}{w} \sum_{j \in D} p_j p_{ji} x_j (1-x_i), \end{aligned} \tag{37}$$

145 and the probability that the mutant frequency decreases by  $1/N_i$  for nodes of degree  $d_i$ ,  $T_i^-$  is

$$T_i^- = \frac{(1+s)}{w} \sum_{j \in D} p_j p_{ji} (1-x_j) x_i. \quad (38)$$

146 Here,  $e_{jn}$  denotes the number of edges that connect nodes of degree  $d_j$  to  $n$  and  $e_{ji}$  denotes the number of  
147 edges that connect nodes of degree  $d_j$  to nodes of degree  $d_i$ .

148 To write out the diffusion equation, we first need to compute the first and second moment of the change  
149 in frequency of the mutant allele at all nodes of degree  $d_i$ , at every time step:

$$E[\Delta x_i] = (T_i^+ - T_i^-) \Delta x_i = \frac{1}{N p_i} (T_i^+ - T_i^-) = w^{-1} \mathcal{O}(x) \quad (39)$$

$$E[(\Delta x_i)^2] = (T_i^+ + T_i^-) (\Delta x_i)^2 = \frac{1}{N^2 p_i^2} (T_i^+ + T_i^-) = w^{-1} \mathcal{O}(x) \quad (40)$$

$$E[\Delta x_i \Delta x_j] = 0 \quad (41)$$

$$E[\Delta x_i] E[\Delta x_j] = (T_i^+ - T_i^-) (T_j^+ - T_j^-) (\Delta x_i)^2 = \frac{1}{N^2 p_i p_j} (T_i^+ - T_i^-) (T_j^+ - T_j^-) = w^{-1} \mathcal{O}(x^2). \quad (42)$$

150 The mean change in mutant frequency at every time step can then be written as

$$\mu_i = \frac{E[\Delta x_i]}{\Delta t} = \frac{1}{p_i} (T_i^+ - T_i^-). \quad (43)$$

151 The variance can be written as

$$\sigma_{ii} = \frac{E[(\Delta x_i)^2] - (E[\Delta x_i])^2}{\Delta t} = \frac{1}{N p_i^2} [T_i^+ - T_i^- - (T_i^+ - T_i^-)^2]. \quad (44)$$

152 The covariance can be written as

$$\sigma_{ij} = \frac{-E[\Delta x_i] E[\Delta x_j]}{\Delta t} = -\frac{1}{N p_i p_j} (T_i^+ - T_i^-) (T_j^+ - T_j^-). \quad (45)$$

153 We can now write the Kolmogorov backward equation. Instead of substituting and writing all the  
154 coefficients in the equation, we are going to denote the the terms by their lowest degree of  $x$

$$\begin{aligned} \frac{\partial P}{\partial t} &= \frac{1}{2} \sum_{i,j \in D} \sigma_{ij} \frac{\partial^2 P}{\partial x_i \partial x_j} + \sum_{i \in D} \mu_i \frac{\partial P}{\partial x_i} \\ &= -\frac{1}{2N} \sum_{i \neq j} w^{-1} \mathcal{O}(x^2) \frac{\partial^2 P}{\partial x_i \partial x_j} + \sum_{i \in D} w^{-1} \mathcal{O}(x) \left( \frac{1}{2N} \frac{\partial^2 P}{\partial x_i^2} + \frac{\partial P}{\partial x_i} \right). \end{aligned} \quad (46)$$

155 We are interested in the stationary solution where

$$-\frac{1}{2N} \sum_{i \neq j} \mathcal{O}(x^2) \frac{\partial^2 P}{\partial x_i \partial x_j} + \sum_{i \in D} \mathcal{O}(x) \left( \frac{1}{2N} \frac{\partial^2 P}{\partial x_i^2} + \frac{\partial P}{\partial x_i} \right) = 0. \quad (47)$$

156 Note that we multiplied by the mean fitness  $w$  on both sides to remove it from the PDE. By solving for  
 157  $P(\vec{x})$ , we have an approximation for the fixation probability given the initial mutant frequencies  $\vec{x}$ . Similarly  
 158 as above, we apply singular perturbation to solve this system.

159 For  $s > 0$ , we introduce new variables  $y_i$ , such that  $\epsilon y_i = x_i$ , where  $\epsilon = \frac{1}{N}$ . Substitute (14) and (15) into  
 160 (47) and write

$$-\frac{1}{2} \sum_{i \neq j} \epsilon^{-1} \mathcal{O}(\epsilon^2 y^2) \frac{\partial^2 P}{\partial y_i \partial y_j} + \sum_{i \in D} \mathcal{O}(\epsilon y) \left( \frac{1}{2} \epsilon^{-1} \frac{\partial^2 P}{\partial x_i^2} + \epsilon^{-1} \frac{\partial P}{\partial x_i} \right) = 0. \quad (48)$$

161 Ignoring vanishingly small higher-order terms of  $\epsilon$ , we write out terms of order  $\epsilon^0$

$$\sum_{i \in D} \mathcal{O}(y) \left( \frac{1}{2} \frac{\partial^2 P}{\partial y_i^2} + \frac{\partial P}{\partial y_i} \right) = 0. \quad (49)$$

162 Equation (49) can be expanded and written as

$$\sum_{i, j \in D} p_j p_{ji} \left( \frac{1}{2 p_i^2} ((1+s)y_j + y_i) \frac{\partial^2}{\partial y_i^2} + \frac{1}{p_i} ((1+s)y_j - y_i) \frac{\partial}{\partial y_i} \right) P = 0. \quad (50)$$

163 The solution to this differential equation has the form

$$P = c_0 + c_1 \exp \left\{ - \sum_j p_j A_j y_j \right\}. \quad (51)$$

164 We can substitute this solution into the Kolmogorov backward equation (50) and solve for the unknown  
 165 exponents:

$$\begin{aligned} & \sum_{i, j \in D} \left( \frac{1}{2} (1+s) A_i^2 p_j p_{ji} y_j + \frac{1}{2} A_i^2 p_j p_{ji} y_i - (1+s) A_i p_j p_{ji} y_j + A_i p_j p_{ji} y_i \right) \\ &= \sum_{i, j \in D} \left( \frac{1}{2} (1+s) A_j^2 p_i p_{ij} y_i + \frac{1}{2} A_i^2 p_j p_{ji} y_i - (1+s) A_j p_i p_{ij} y_i + A_i p_j p_{ji} y_i \right) = 0. \end{aligned} \quad (52)$$

166 We end up with the following system of quadratic equations to solve

$$\sum_{j \in D} \left( (1+s)A_j^2 p_i p_{ij} + A_i^2 p_j p_{ji} - 2(1+s)A_j p_i p_{ij} + 2A_i p_j p_{ji} \right) = 0 \quad \forall i. \quad (53)$$

167 Assuming there is a non-trivial real solution to this system, similarly as above, for the death-birth process,  
 168 we can use geometric intuition to estimate where the solution is. We do so by summing all the equations in  
 169 system to get the following equation

$$\begin{aligned} & \sum_{i,j \in D} \left( (1+s)A_j^2 p_i p_{ij} + A_i^2 p_j p_{ji} - 2(1+s)A_j p_i p_{ij} + 2A_i p_j p_{ji} \right) \\ &= \sum_{i,j \in D} \left( (1+s)A_i^2 p_j p_{ji} + A_i^2 p_j p_{ji} - 2(1+s)A_i p_j p_{ji} + 2A_i p_j p_{ji} \right) \\ &= \sum_{i \in D} \left[ ((1+s)A_i^2 + A_i^2 - 2(1+s)A_i + 2A_i) \sum_{j \in D} p_j p_{ji} \right] \\ &= \sum_{i \in D} \left( [(2+s)A_i^2 - 2sA_i] \sum_{j \in D} p_j p_{ji} \right). \end{aligned} \quad (54)$$

170 In elliptic form, we can write

$$\sum_{i \in D} \left[ \left( A_i - \frac{s}{2+s} \right)^2 \sum_{j \in D} p_j p_{ji} \right] = \left( \frac{s}{2+s} \right)^2 \sum_{i \in D} \sum_{j \in D} p_j p_{ji}. \quad (55)$$

171 Like in the case of the death-Birth process, this equation provides valuable information on the dynamics of  
 172 the system of ellipsoids. This ellipsoid contains all solutions to the system, since it is constructed from linear  
 173 combinations of these ellipsoids. It is centered at  $s/(2+s)\vec{1}$  with axial lengths proportional to  $s/(2+s)$ .  
 174 In the neutral case where  $s = 0$ , this ellipsoid collapses into a single point at the origin. Since all solutions  
 175 of the elliptic system satisfy the equations, the system has exactly one real solution at the origin. As the  
 176 strength of selection  $s$  increases, the distance between the solution at the origin and all other real solutions  
 177 grows proportional to the axial lengths, which themselves are proportional to  $s/(2+s)$ .

178 Next, we use regular perturbation to study the elliptic system. We can write the solution of the system  
 179 as

$$A_i = A_{i,0} + sA_{i,1} + \mathcal{O}(s^2). \quad (56)$$

180 Substitute (56) and the following

$$A_i^2 = A_{i,0}^2 + sA_{i,0}A_{i,1} + \mathcal{O}(s^2) \quad (57)$$

181 into the system and we can write

$$\begin{aligned} \sum_{j \in D} \left[ (1+s)(A_{j,0}^2 + sA_{j,0}A_{j,1} - 2A_{j,0} - 2sA_{j,1})p_j p_{ji} \right. \\ \left. + (A_{i,0}^2 + sA_{i,0}A_{i,1} + 2A_{i,0} + 2sA_{i,1})p_i p_{ij} \right] = \mathcal{O}(s^2). \end{aligned} \quad (58)$$

182 In the order of  $s^0$ , we can derive  $A_{i,0}$  using

$$\sum_{j \in D} \left[ (A_{j,0}^2 - 2A_{j,0})p_i p_{ij} + (A_{i,0}^2 + 2A_{i,0})p_j p_{ji} \right] = 0. \quad (59)$$

183 This is exactly the elliptic system corresponding to the neutral case where  $s = 0$ . We know that this system  
184 only has one real solution at the origin.

185 For the order of  $s^1$ , we can derive  $A_{i,1}$  using

$$\sum_{j \in D} \left( -2A_{j,1}p_i p_{ij} + 2A_{i,1}p_j p_{ji} \right) = 0. \quad (60)$$

186 Using the handshaking lemma, (see (29)), we can rewrite the above as

$$\sum_{j \in D} p_j p_{ji} \left( -A_{j,1} \frac{d_j}{d_i} + A_{i,1} \right) = 0. \quad (61)$$

187 It follows that points on the line  $A_i = Ad_i$  satisfy this equation. We now have an approximation of the  
188 solution of the system

$$A_i = sAd_i^{-1} + \mathcal{O}(s^2). \quad (62)$$

189 This agrees with the fact that real solutions grow proportional to  $s/(2+s)$ . Since we know the solution to  
190 the system must satisfy (55), we can find the intersection of (62) with (55) and the error from this point to  
191 the real intersection is of  $\mathcal{O}(s^2)$ .

192

The value  $A$  that approximates the solution of the system is

$$\begin{aligned}
& \sum_{i \in D} \left( [(2+s)A^2 d_i^{-2} - 2sA d_i^{-1}] \sum_{j \in D} p_j p_{ji} \right) = 0 \\
& \implies (2+s)A^2 \sum_{i,j \in D} p_j p_{ji} d_i^{-2} - 2sA \sum_{i,j \in D} p_j p_{ji} d_i^{-1} = 0 \\
& \implies (2+s)A \sum_{i,j \in D} p_j p_{ji} d_i^{-2} = 2s \sum_{i,j \in D} p_j p_{ji} d_i^{-1} \\
& \implies A = \frac{2s}{2+s} \left( \sum_{i,j \in D} p_j p_{ji} d_i^{-1} \right) \left( \sum_{i,j \in D} p_j p_{ji} d_i^{-2} \right)^{-1}. \tag{63}
\end{aligned}$$

193

Substituting this back into (51) to find the constants that satisfy the boundary condition  $p(\vec{x} = \vec{0}) = 0$

194

and  $p(\vec{x} = \vec{1}) = 1$ , we get the approximation for the fixation probability as

$$\begin{aligned}
P(\vec{x}) &= \frac{1 - \exp \left\{ -NA \sum_{i \in D} p_i d_i^{-1} x_i \right\}}{1 - \exp \left\{ -NA \sum_{i \in D} p_i d_i^{-1} \right\}} \\
&= \frac{1 - \exp \left\{ -NA \sum_{i \in D} p_i d_i^{-1} x_i \right\}}{1 - \exp \left\{ -NA \langle d^{-1} \rangle \right\}}. \tag{64}
\end{aligned}$$

195

Assuming that the mutant was introduced in a random node of the network, the fixation probability can be

196

written as

$$P\left(\vec{x} = \frac{\vec{1}}{N}\right) = \frac{1 - \exp \left\{ -A \langle d^{-1} \rangle \right\}}{1 - \exp \left\{ -NA \langle d^{-1} \rangle \right\}}. \tag{65}$$

197

To summarize, the fixation probability for the Birth-death process on a network is given by

$$P_{Bd} = \frac{1 - e^{-\alpha_{Bd}s/(1+s/2)}}{1 - e^{-\alpha_{Bd}Ns/(1+s/2)}}, \quad \text{where } \alpha_{Bd} = \left( \langle d^{-1} \rangle \sum_{i,j \in D} p_j p_{ji} d_i^{-1} \right) \left( \sum_{i,j \in D} p_j p_{ji} d_i^{-2} \right)^{-1}. \tag{66}$$

198

Here,  $\alpha_{Bd}$  is the network quantity that governs the evolutionary dynamics on graphs under the Birth-death

199

update rule.

200

In **Supplementary Figure S5** we show how well (66) approximates the fixation probability obtained

201

from solving (53) numerically. In our derivation of the approximation, we ignored the  $\mathcal{O}(s^2)$  portion of the

202

roots of (53). The error that accumulates is on the order of  $Ns^2$ , therefore, as long as  $s \ll N^{-1/2}$  the

203

approximation should hold. The numerical solution starts to deviate from the approximate solution as  $s$

204

increases for  $\alpha_{Bd} < 1$ .

### 205 3 The change in amplification due to rewiring

206 Here we expand on the derivation of equation (10) in the main text. We write the numerator and denominator  
 207 in (66):

$$\begin{aligned}\mu_1 &= \sum_{i,j \in D} p_j p_{ji} d_i^{-1}, \\ \mu_2 &= \sum_{i,j \in D} p_j p_{ji} d_i^{-2}\end{aligned}\tag{67}$$

208 and we consider the change in the numerator and denominator under one rewiring step:

$$\begin{aligned}\Delta\mu_1 &= -p_i \frac{1}{N p_i d_i} \frac{1}{d_i} - p_j \frac{1}{N p_j d_j} \frac{1}{d_j} + p_i \frac{1}{N p_i d_i} \frac{1}{d_j} + p_j \frac{1}{N p_j d_j} \frac{1}{d_i} \\ &= -\frac{1}{N d_i^2} - \frac{1}{N d_j^2} + \frac{2}{N d_i d_j} \\ &= \frac{1}{N} \frac{2 d_i d_j - d_i^2 - d_j^2}{d_i^2 d_j^2} \\ &= -\frac{1}{N} \frac{(d_i - d_j)^2}{d_i^2 d_j^2} < 0\end{aligned}$$

209 and

$$\begin{aligned}\Delta\mu_2 &= -p_i \frac{1}{N p_i d_i} \frac{1}{d_i^2} - p_j \frac{1}{N p_j d_j} \frac{1}{d_j^2} + p_i \frac{1}{N p_i d_i} \frac{1}{d_j^2} + p_j \frac{1}{N p_j d_j} \frac{1}{d_i^2} \\ &= -\frac{1}{N d_i^3} - \frac{1}{N d_j^3} + \frac{1}{N d_i^2 d_j} + \frac{1}{N d_i d_j^2} \\ &= \frac{1}{N} \frac{d_i^2 d_j + d_i d_j^2 - d_i^3 - d_j^3}{d_i^3 d_j^3} \\ &= \frac{1}{N} \frac{d_i^2 (d_j - d_i) + d_j^2 (d_i - d_j)}{d_i^3 d_j^3} \\ &= -\frac{1}{N} \frac{(d_i^2 - d_j^2)(d_i - d_j)}{d_i^3 d_j^3} \\ &= -\frac{1}{N} \frac{(d_i + d_j)(d_i - d_j)^2}{d_i^3 d_j^3} < 0.\end{aligned}$$



210 Since the change is on the order of  $\frac{1}{N}$ , we can approximate the change by

$$\begin{aligned}
\Delta \frac{\mu_1}{\mu_2} &= \frac{\mu_1 + \Delta\mu_1}{\mu_2 + \Delta\mu_2} - \frac{\mu_1}{\mu_2} \\
&= (\mu_1 + \Delta\mu_1) \left( \frac{1}{\mu_2} - \frac{\Delta\mu_2}{\mu_2^2} \right) - \frac{\mu_1}{\mu_2} \\
&= \frac{\Delta\mu_1}{\mu_2} - \frac{\mu_1 \Delta\mu_2}{\mu_2^2} \\
&= \frac{\mu_1}{\mu_2^2} \left( \frac{\mu_2}{\mu_1} \Delta\mu_1 - \Delta\mu_2 \right) \\
&= \frac{\mu_1}{N\mu_2^2} \left( \frac{\mu_2}{\mu_1} \frac{\mu_2 - (d_i - d_j)^2}{d_i^2 d_j^2} - \frac{(d_i + d_j)(d_i - d_j)^2}{d_i^3 d_j^3} \right) \\
&= \frac{\mu_1}{N\mu_2^2} \frac{(d_i - d_j)^2}{d_i^2 d_j^2} \left( -\frac{\mu_2}{\mu_1} + \frac{d_i + d_j}{d_i d_j} \right) \\
&= \frac{\mu_1}{N\mu_2^2} \frac{(d_i - d_j)^2}{d_i^2 d_j^2} \left( \frac{1}{d_i} + \frac{1}{d_j} - \frac{\mu_2}{\mu_1} \right).
\end{aligned}$$

## 211 4 The approximation for detour graphs under weak selection

212 Here we present the derivation of equation (12) in the main text. We obtain an alternate approximate  
213 solution to the Kolmogorov backward equation by using regular perturbation. This is because the previous  
214 derivation underestimates probabilities of fixation on detour graphs, since they have very few edges that  
215 connect nodes of different degrees.

216 We expand the solution to (47) in terms of  $s$

$$P = P_0 + sP_1 + s^2P_2 + \dots \quad (68)$$

217 Substitute into equation (47) and obtain the following

$$\sum_{i \in D, j \in D} p_j p_{ji} \left( \frac{1}{2Np_i^2} [(1+s)x_j + x_i - (2+s)x_i x_j] \frac{\partial^2}{\partial x_i^2} (P_0 + sP_1 + \dots) + \frac{1}{p_i} [(1+s)x_j - x_i - s x_i x_j] \frac{\partial}{\partial x_i} (P_0 + sP_1 + \dots) \right) = 0. \quad (69)$$

218 Under weak selection, the terms in the equation above independent of  $s$  can be written as

$$\sum_{i \in D, j \in D} p_j p_{ji} \left( \frac{1}{2N p_i^2} (x_j + x_i - 2x_i x_j) \frac{\partial^2 P_0}{\partial x_i^2} + \frac{1}{p_i} (x_j - x_i) \frac{\partial P_0}{\partial x_i} \right) = 0. \quad (70)$$

219 This equation is identical to the Kolmogorov backward equation under neutrality. The solution is known  
220 and is given by

$$P_0 = \frac{1}{\langle d^{-1} \rangle} \sum_{i \in D} \frac{p_i x_i}{d_i}. \quad (71)$$

221 Next, we collect the terms of the first order term of  $s$  and write

$$\begin{aligned} & \sum_{i \in D, j \in D} p_j p_{ji} \left( \frac{1}{2N p_i^2} (x_j - x_i x_j) \frac{\partial^2 P_0}{\partial x_i^2} + \frac{1}{p_i} (x_j - x_i x_j) \frac{\partial P_0}{\partial x_i} + \right. \\ & \quad \left. \frac{1}{2N p_i^2} (x_j + x_i - 2x_i x_j) \frac{\partial^2 P_1}{\partial x_i^2} + \frac{1}{p_i} (x_j - x_i) \frac{\partial P_1}{\partial x_i} \right) = 0 \\ & = \sum_{i \in D, j \in D} p_j p_{ji} \left( \frac{1}{\langle d^{-1} \rangle d_i} (x_j - x_i x_j) + \right. \\ & \quad \left. \frac{1}{2N p_i^2} (x_j + x_i - 2x_i x_j) \frac{\partial^2 P_1}{\partial x_i^2} + \frac{1}{p_i} (x_j - x_i) \frac{\partial P_1}{\partial x_i} \right) = 0. \end{aligned} \quad (72)$$

222 The solution has the form

$$\begin{aligned} P_1 &= \sum_{ij} p_i p_j A_{ij} x_i (1 - x_j) \\ &= \sum_i p_i A_i x_i - \sum_{ij} p_i p_j A_{ij} x_i x_j, \quad \text{where } A_i = \sum_j p_j A_{ij}. \end{aligned} \quad (73)$$

223 and we need to solve for the unknowns  $A_i$  and  $A_{ij}$ . We know the solution to (72) has to have this form  
224 because the neutrality solution  $P_0$  already satisfies the boundary conditions  $P(0) = 0$  and  $P(1) = 1$ , so  
225  $P_1(0) = 0$  and  $P_1(1) = 0$  are required. The partial derivatives are given by

$$\frac{\partial P_1}{\partial x_i} = p_i A_i - 2p_i \sum_j p_j A_{ij} \quad \text{and} \quad \frac{\partial^2 P_1}{\partial x_i \partial x_j} = -2p_i p_j A_{ij}. \quad (74)$$

226 Substitute in (72) and we have

$$\begin{aligned} & \sum_{i \in D, j \in D} p_j p_{ji} \left[ \frac{1}{\langle d^{-1} \rangle d_i} (x_j - x_i x_j) - \frac{A_{ii}}{N} (x_j + x_i - 2x_i x_j) \right. \\ & \quad \left. + (x_j - x_i) \left( A_i - \sum_k p_k A_{ik} x_k - p_i A_{ii} x_i \right) \right] = 0. \end{aligned} \quad (75)$$

227 In order for the equation to be satisfied all the coefficients must sum to zero. Therefore, the conditions for  
 228 the linear terms,  $x'_i$ s, are

$$\sum_{j \in D} \left[ -p_j p_{ji} \left( \frac{A_{ii}}{N} + A_i \right) + p_i p_{ij} \left( \frac{1}{\langle d^{-1} \rangle d_j} - \frac{A_{jj}}{N} + A_j \right) \right] = 0. \quad (76)$$

229 For the quadratic terms,  $x_i x'_j$ s, we re-index to collect the like quadratic terms

$$\begin{aligned} & \sum_{i \in D, j \in D} p_j p_{ji} \left( -\frac{x_i x_j}{\langle d^{-1} \rangle d_i} + 2 \frac{A_{ii}}{N} x_i x_j - 2(x_j - x_i) \sum_k p_k A_{ik} x_k \right) = 0 \\ \Rightarrow & \sum_{i \in D, j \in D} p_j p_{ji} \left( -\frac{x_i x_j}{\langle d^{-1} \rangle d_i} + 2 \frac{A_{ii}}{N} x_i x_j - 2 \sum_k p_k A_{ik} x_j x_k + 2 \sum_k p_k A_{ik} x_i x_k \right) = 0 \\ \Rightarrow & \sum_{i \in D, j \in D} \left[ p_j p_{ji} \left( -\frac{x_i x_j}{\langle d^{-1} \rangle d_i} + 2 \frac{A_{ii}}{N} x_i x_j \right) \right. \\ & \quad \left. - 2 \sum_k p_k p_j p_{ji} A_{ik} x_j x_k + 2 \sum_k p_k p_j p_{ji} A_{ik} x_i x_k \right] = 0 \\ \Rightarrow & \sum_{i \in D, j \in D} \left[ p_j p_{ji} \left( -\frac{x_i x_j}{\langle d^{-1} \rangle d_i} + 2 \frac{A_{ii}}{N} x_i x_j \right) \right. \\ & \quad \left. - 2 \sum_k p_i p_j p_{jk} A_{ki} x_i x_j + 2 \sum_k p_j p_k p_{ki} A_{ij} x_i x_j \right] = 0. \end{aligned} \quad (77)$$

230 For the coefficients of the quadratic terms to sum to zero, the following set of equations must be satisfied

$$\begin{aligned} & p_j p_{ji} \left( -\frac{1}{\langle d^{-1} \rangle d_i} + 2 \frac{A_{ii}}{N} \right) - 2 \sum_k p_i p_j p_{jk} A_{ki} + 2 \sum_k p_j p_k p_{ki} A_{ij} \\ & \quad + p_i p_{ij} \left( -\frac{1}{\langle d^{-1} \rangle d_j} + 2 \frac{A_{jj}}{N} \right) - 2 \sum_k p_j p_i p_{ik} A_{kj} + 2 \sum_k p_i p_k p_{kj} A_{ij} = 0. \end{aligned} \quad (78)$$

231 Equations (74), (76), and (78) form a system of linear equations in which we solve for all the  $A$  terms.

232 Next, we show that equation (76) is actually redundant given (74) and (78). To do so, we sum (78) by  $j$

233 and apply (74) and write

$$\begin{aligned}
& \sum_j p_j p_{ji} \left( \frac{1}{\langle d^{-1} \rangle d_i} - 2 \frac{A_{ii}}{N} \right) + \sum_j p_i p_{ij} \left( \frac{1}{\langle d^{-1} \rangle d_j} - 2 \frac{A_{jj}}{N} \right) \\
& \quad + 2 \sum_{jk} p_i p_j p_{jk} A_{ki} + 2 \sum_{jk} p_j p_i p_{ik} A_{kj} = 2 \sum_{kj} p_i p_k p_{kj} A_{ij} + 2 \sum_{kj} p_j p_k p_{ki} A_{ij} \\
\Rightarrow & \sum_j p_j p_{ji} \left( \frac{1}{\langle d^{-1} \rangle d_i} - 2 \frac{A_{ii}}{N} \right) + \sum_j p_i p_{ij} \left( \frac{1}{\langle d^{-1} \rangle d_j} - 2 \frac{A_{jj}}{N} \right) \\
& \quad + 2 \sum_{jk} p_i p_j p_{jk} A_{ki} + 2 \sum_k p_i p_{ik} A_k = 2 \sum_{kj} p_i p_k p_{kj} A_{ij} + 2 \sum_k p_k p_{ki} A_i \\
\Rightarrow & \sum_j p_j p_{ji} \left( \frac{1}{\langle d^{-1} \rangle d_i} - 2 \frac{A_{ii}}{N} \right) + \sum_j p_i p_{ij} \left( \frac{1}{\langle d^{-1} \rangle d_j} - 2 \frac{A_{jj}}{N} \right) \\
& \quad + 2 \sum_{jk} p_i p_j p_{jk} A_{ki} + 2 \sum_k p_i p_{ik} A_k = 2 \sum_{kj} p_i p_j p_{jk} A_{ik} + 2 \sum_k p_k p_{ki} A_i \\
\Rightarrow & \sum_j p_j p_{ji} \left( \frac{1}{\langle d^{-1} \rangle d_i} - 2 \frac{A_{ii}}{N} \right) + \sum_j p_i p_{ij} \left( \frac{1}{\langle d^{-1} \rangle d_j} - 2 \frac{A_{jj}}{N} \right) + 2 \sum_k p_i p_{ik} A_k = 2 \sum_k p_k p_{ki} A_i \tag{79}
\end{aligned}$$

234 Lastly, we set this equal to two times equations (76),

$$\begin{aligned}
& \sum_j p_j p_{ji} \left( \frac{1}{\langle d^{-1} \rangle d_i} - 2 \frac{A_{ii}}{N} \right) + \sum_j p_i p_{ij} \left( \frac{1}{\langle d^{-1} \rangle d_j} - 2 \frac{A_{jj}}{N} \right) + 2 \sum_k p_i p_{ik} A_k - 2 \sum_k p_k p_{ki} A_i \\
& \quad = 2 \sum_{j \in D} \left[ -p_j p_{ji} \left( \frac{A_{ii}}{N} + A_i \right) + p_i p_{ij} \left( \frac{1}{\langle d^{-1} \rangle d_j} - \frac{A_{jj}}{N} + A_j \right) \right] = 0 \\
\Rightarrow & \sum_j p_j p_{ji} \left( \frac{1}{\langle d^{-1} \rangle d_i} \right) + \sum_j p_i p_{ij} \left( \frac{1}{\langle d^{-1} \rangle d_j} \right) + 2 \sum_k p_i p_{ik} A_k - 2 \sum_k p_k p_{ki} A_i \\
& \quad = 2 \sum_{j \in D} \left[ -p_j p_{ji} A_i + p_i p_{ij} \left( \frac{1}{\langle d^{-1} \rangle d_j} + A_j \right) \right] \\
\Rightarrow & \sum_j p_j p_{ji} \left( \frac{1}{\langle d^{-1} \rangle d_i} \right) + \sum_j p_i p_{ij} \left( \frac{1}{\langle d^{-1} \rangle d_j} \right) = 2 \sum_{j \in D} p_i p_{ij} \left( \frac{1}{\langle d^{-1} \rangle d_j} \right) \\
\Rightarrow & \sum_j p_j p_{ji} \left( \frac{1}{\langle d^{-1} \rangle d_i} \right) = \sum_{j \in D} p_i p_{ij} \left( \frac{1}{\langle d^{-1} \rangle d_j} \right). \tag{80}
\end{aligned}$$

235 This last equation is true by the handshaking lemma (see (29)). This proves that (76) is redundant given  
236 (74) and (78) and therefore we need only solve a much smaller set of equations.

To conclude, we can approximate the fixation probability using

$$P(x) \approx \frac{1}{\langle d^{-1} \rangle} \sum_{i \in D} \frac{p_i x_i}{d_i} + s \sum_{ij} p_i p_j A_{ij} x_i (1 - x_j), \quad (81)$$

where  $A_{ij}$  is found by solving (78).

239 **5** Supplementary figures

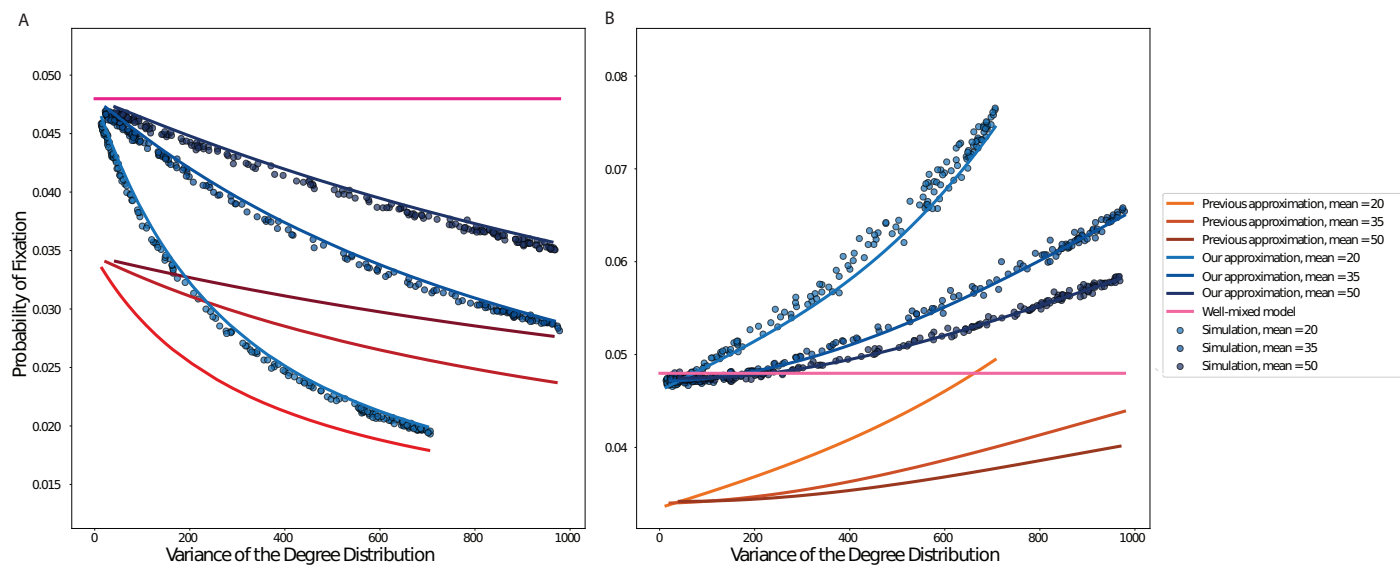

Figure S1: **Comparison with previous analytical methods.** The dots represent ensemble averages across  $10^6$  replicate Monte Carlo simulations, while the lines represent our analytical approximations. Previous approximation made using analytical results for weak selection from McAvoy and Allen (2021). **Panel A** corresponds to the death-Birth update rule, while **Panel B** shows results for the Birth-death process. We use preferential attachment PA graphs, graph size  $N = 100$  and  $N_s = 5$ .

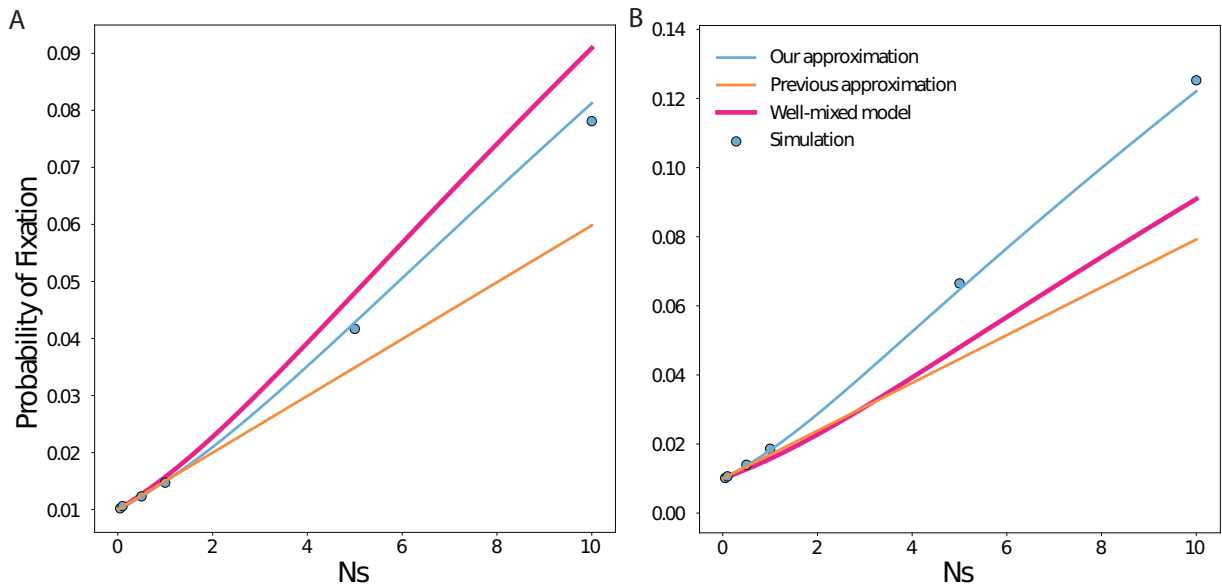

Figure S2: **Comparison with previous analytical methods.** The dots represent ensemble averages across  $10^6$  replicate Monte Carlo simulations, while the lines represent our analytical approximations. Previous approximation made using analytical results for weak selection from McAvooy and Allen (2021). **Panel A:** We show results for the death-Birth process on preferential attachment graphs with mean degree equal to 5.88 and variance in degree is 4.75. Graph size  $N = 100$ .  $Ns$  ranges from 0.001 to 10. **Panel B:** We show results for the Birth-death process on preferential attachment graphs with mean degree equal to 5.88 and variance in degree is 266.3. Graph size  $N = 100$ .  $Ns$  ranges from 0.001 to 10.

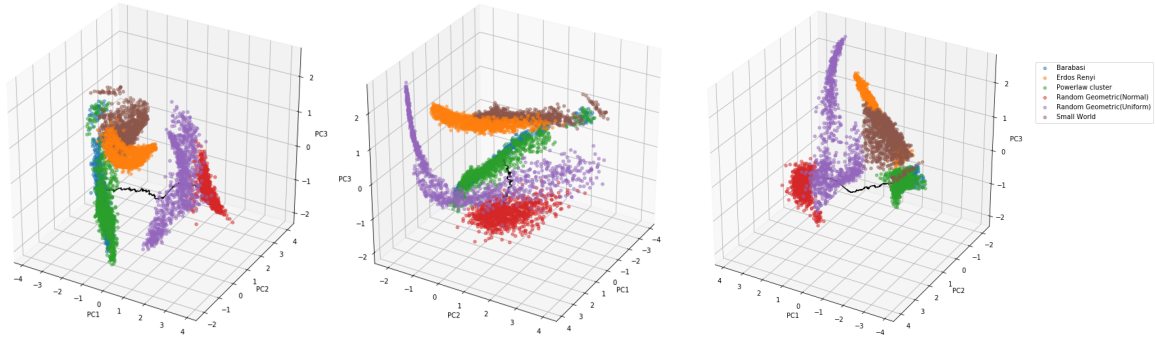

Figure S3: **Visualizing the space of network statistics explored.** We use principle component analysis on six graph characteristics (mean, variance, third moment, modularity, average clustering, and assortativity). Each graph family clusters together and we use novel network generation algorithms to explore the spaces in between generation algorithms that are family-specific. The black line represents a trajectory in PCA space of the rewiring from PA to RGG. The trajectory starts at PA and passes through PLC and RGG(uniform) to RGG(normal).



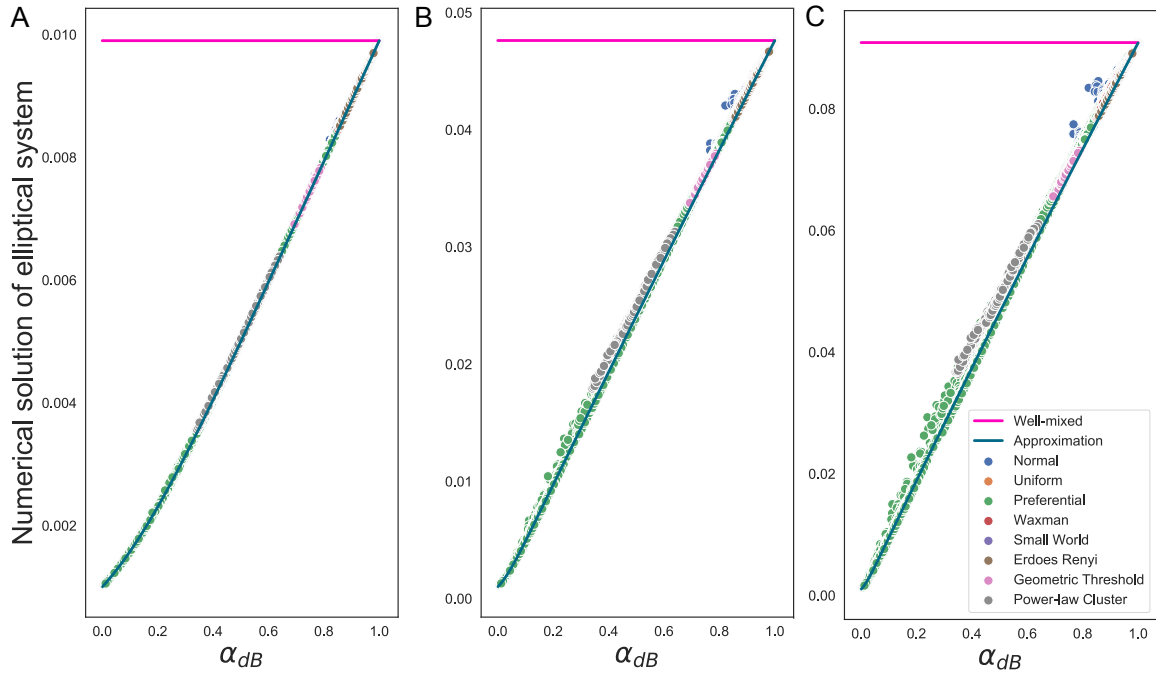

Figure S4: **Analytical approximation of the solution to the diffusion equation for the death-Birth process.** The lines are the approximation of fixation probabilities using (35). The dots are approximations using the numerical solutions of (21). Each dot represents a distinct graph. There are 5703 graphs presented. Graph size  $N = 1000$ . The various colors represent different network families. **Panel A**  $s = 0.01$ ,  $N_s = 10$ ; **Panel B**  $s = 0.05$ ,  $N_s = 50$ ; and **Panel C**  $s = 0.1$ ,  $N_s = 100$ .

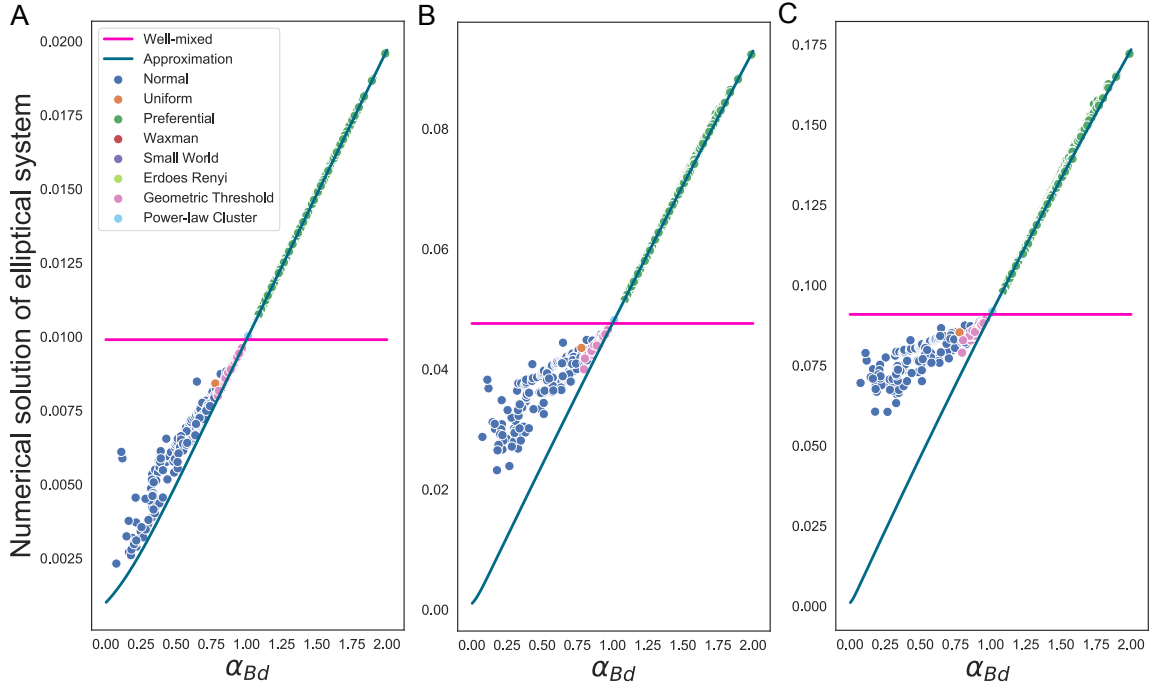

Figure S5: **Analytical approximation of the solution to the diffusion equation for the Birth-death process.** The lines are the approximation of fixation probabilities using (66). The dots are approximations using the numerical solutions of (53). Each dot represents a distinct graph. There are 5703 graphs presented. Graph size  $N = 1000$ . The various colors represent different network families. **Panel A**  $s = 0.01$ ,  $Ns = 10$ ; **Panel B**  $s = 0.05$ ,  $Ns = 50$ ; and **Panel C**  $s = 0.1$ ,  $Ns = 100$ .

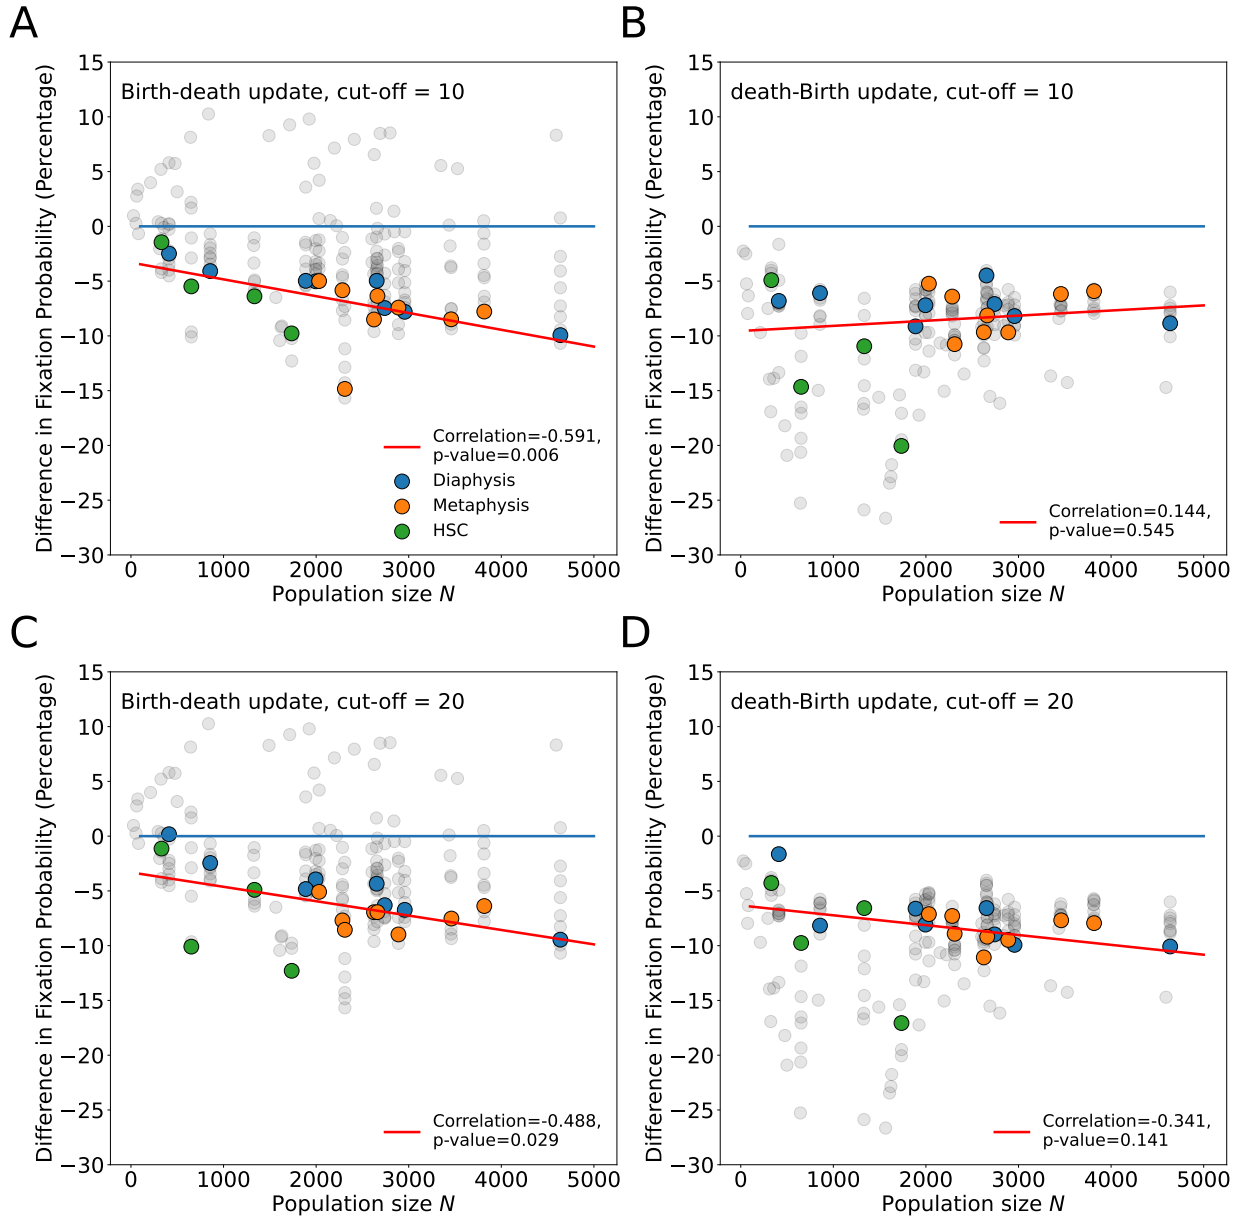

Figure S6: **Robustness of cutoff distance for the bone marrow networks.** Similar to Figure 6 in main text. Here we build the stem cell geometric random graphs and the color dots use cut-off distances of 10 and 20. Grey dots are results from other cut-off ratios for comparison. Here,  $s = 0.01$  and  $N$ s varies with population size. Results from at least 1 million simulations. **Panel A:** Birth-death update with cut-off distance 10. **Panel B:** death-Birth update with cut-off distance 10. **Panel C:** Birth-death update with cut-off distance 20. **Panel D:** death-Birth update with cut-off distance 20.

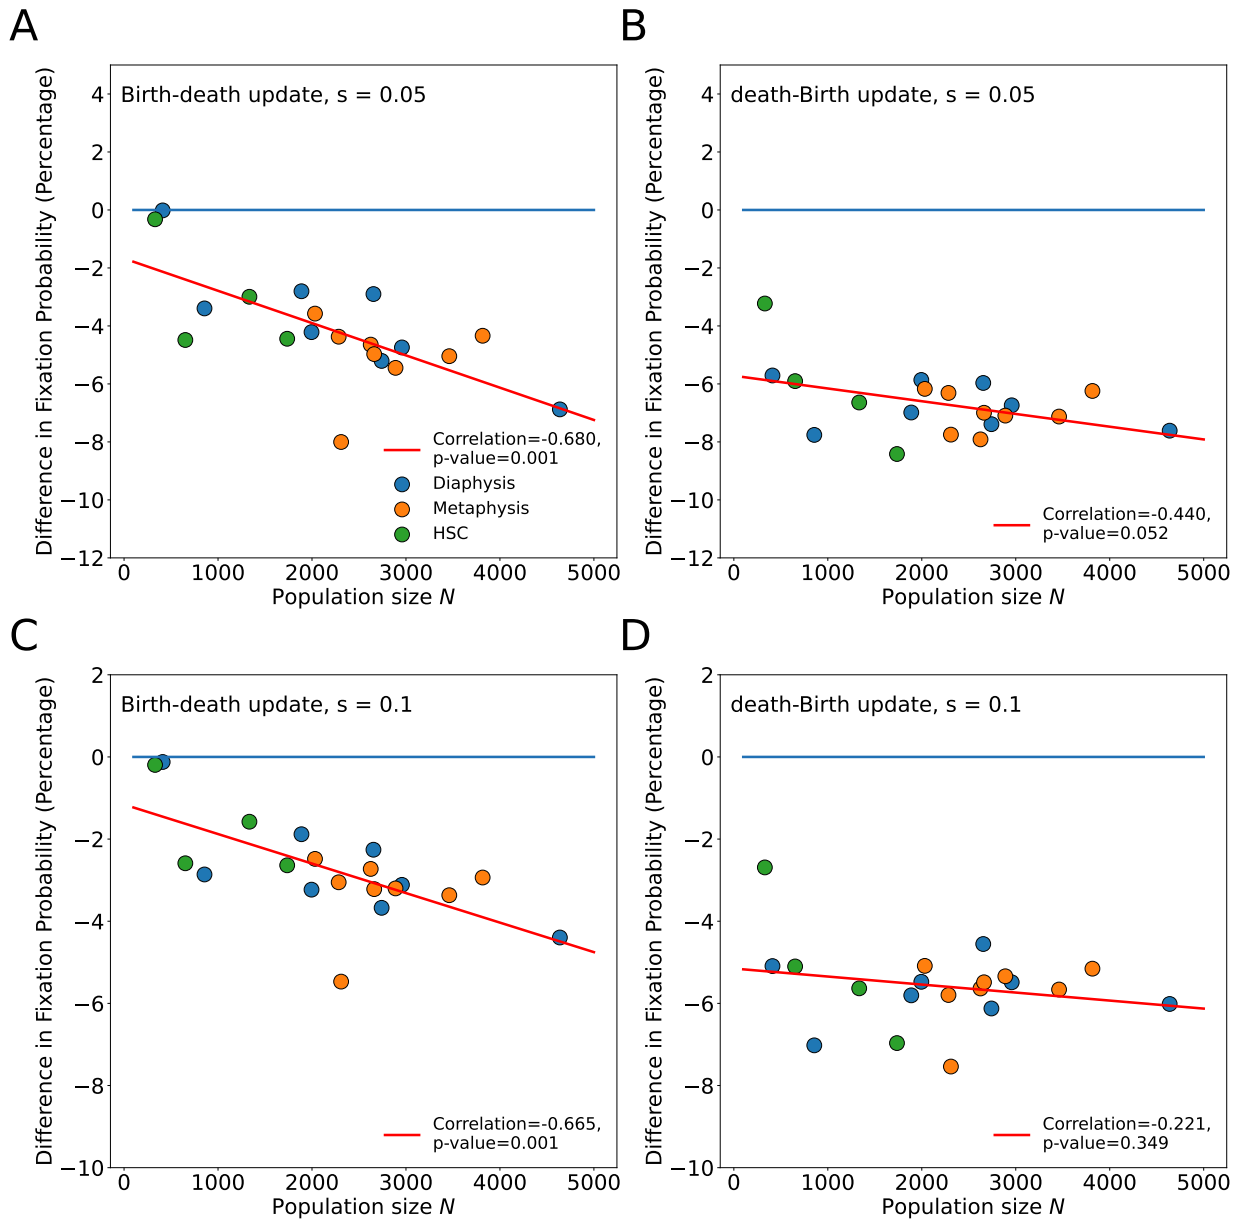

Figure S7: **The effect of varying the selection coefficient in the bone marrow networks.** Similar to Figure 6 in main text. Here we build the stem cell geometric random graphs and the color dots use cut-off distances of 15. Results from at least 1 million simulations. **Panel A:** Birth-death update with  $s = 0.05$ . **Panel B:** death-Birth update with update with  $s = 0.05$ . **Panel C:** Birth-death update with update with  $s = 0.1$ . **Panel D:** death-Birth update with update with  $s = 0.1$ .

## 240 **References**

- 241 Tibor Antal, Sidney Redner, and Vishal Sood. Evolutionary dynamics on degree-heterogeneous graphs.  
242 *Physical Review Letters*, 96(18):188104, 2006.
- 243 Yu-Ting Chen et al. Sharp benefit-to-cost rules for the evolution of cooperation on regular graphs. *The*  
244 *Annals of Applied Probability*, 23(2):637–664, 2013.
- 245 Sergey Gavrillets and Nathan Gibson. Fixation probabilities in a spatially heterogeneous environment. *Pop-*  
246 *ulation Ecology*, 44(2):51–58, 2002.
- 247 Alex McAvoy and Benjamin Allen. Fixation probabilities in evolutionary dynamics under weak selection.  
248 *Journal of Mathematical Biology*, 82(3):14, 2021.
- 249 Hidenori Tachida and Masaru Iizuka. Fixation probability in spatially changing environments. *Genetics*  
250 *Research*, 58(3):243–251, 1991.

## List of Figures

- 251 **List of Figures**
- 252 Figure S1. **Comparison with previous analytical methods.** The dots represent ensemble  
253 averages across  $10^6$  replicate Monte Carlo simulations, while the lines represent our analytical  
254 approximations. Previous approximation made using analytical results for weak selection from  
255 McAvoy and Allen (2021). **Panel A** corresponds to the death-Birth update rule, while **Panel**  
256 **B** shows results for the Birth-death process. We use preferential attachment PA graphs, graph  
257 size  $N = 100$  and  $Ns = 5$ .
- 258 Figure S2. **Comparison with previous analytical methods.** The dots represent ensemble  
259 averages across  $10^6$  replicate Monte Carlo simulations, while the lines represent our analytical  
260 approximations. Previous approximation made using analytical results for weak selection from  
261 McAvoy and Allen (2021). **Panel A:** We show results for the death-Birth process on preferential  
262 attachment graphs with mean degree equal to 5.88 and variance in degree is 4.75. Graph size  
263  $N = 100$ .  $Ns$  ranges from 0.001 to 10. **Panel B:** We show results for the Birth-death process on  
264 preferential attachment graphs with mean degree equal to 5.88 and variance in degree is 266.3.  
265 Graph size  $N = 100$ .  $Ns$  ranges from 0.001 to 10.
- 266 Figure S3. **Visualizing the space of network statistics explored.** We use principle component analysis  
267 on six graph characteristics (mean, variance, third moment, modularity, average clustering,  
268 and assortativity). Each graph family clusters together and we use novel network generation  
269 algorithms to explore the spaces in between generation algorithms that are family-specific. The  
270 black line represents a trajectory in PCA space of the rewiring from PA to RGG. The trajectory  
271 starts at PA and passes through PLC and RGG(uniform) to RGG(normal).
- 272 Figure S4. **Analytical approximation of the solution to the diffusion equation for the death-**  
273 **Birth process.** The lines are the approximation of fixation probabilities using (35). The dots  
274 are approximations using the numerical solutions of (21). Each dot represents a distinct graph.  
275 There are 5703 graphs presented. Graph size  $N = 1000$ . The various colors represent different  
276 network families. **Panel A**  $s = 0.01$ ,  $Ns = 10$ ; **Panel B**  $s = 0.05$ ,  $Ns = 50$ ; and **Panel C**  
277  $s = 0.1$ ,  $Ns = 100$ .
- 278 Figure S5. **Analytical approximation of the solution to the diffusion equation for the Birth-**  
279 **death process.** The lines are the approximation of fixation probabilities using (66). The dots  
280 are approximations using the numerical solutions of (53). Each dot represents a distinct graph.  
281 There are 5703 graphs presented. Graph size  $N = 1000$ . The various colors represent different

282 network families. **Panel A**  $s = 0.01$ ,  $Ns = 10$ ; **Panel B**  $s = 0.05$ ,  $Ns = 50$ ; and **Panel C**  
283  $s = 0.1$ ,  $Ns = 100$ .

284 **Figure S6. Robustness of cutoff distance for the bone marrow networks.** Similar to Figure 6 in  
285 main text. Here we build the stem cell geometric random graphs and the color dots use cut-off  
286 distances of 10 and 20. Grey dots are results from other cut-off ratios for comparison. Here,  
287  $s = 0.01$  and  $Ns$  varies with population size. Results from at least 1 million simulations. **Panel**  
288 **A:** Birth-death update with cut-off distance 10. **Panel B:** death-Birth update with cut-off  
289 distance 10. **Panel C:** Birth-death update with cut-off distance 20. **Panel D:** death-Birth  
290 update with cut-off distance 20.

291 **Figure S7. The effect of varying the selection coefficient in the bone marrow networks.** Similar  
292 to Figure 6 in main text. Here we build the stem cell geometric random graphs and the color  
293 dots use cut-off distances of 15. Results from at least 1 million simulations. **Panel A:** Birth-  
294 death update with  $s = 0.05$ . **Panel B:** death-Birth update with update with  $s = 0.05$ . **Panel**  
295 **C:** Birth-death update with update with  $s = 0.1$ . **Panel D:** death-Birth update with update  
296 with  $s = 0.1$ .
